# Supplementary material for: Acrolein Promotes Aging and Oxidative Stress via the Stress Response Factor DAF-16/FOXO in Caenorhabditis elegans
Source: MDPI journal article supplement (doi:10.3390/foods11111590), 2022-05-28
Supplement: s1 [file s1]

**Table S1.** Primer sequences for qRT-PCR.

| <b>Gene</b>   | <b>Primer</b> | <b>Sequence (5'-3')</b> |
|---------------|---------------|-------------------------|
| <i>daf-16</i> | Forward       | TTTCCGTCCCCGAACTCAA     |
|               | Reverse       | ATTCGCCAACCCATGATGG     |
| <i>ctl-1</i>  | Forward       | GCGGATACCGTACTCGTGAT    |
|               | Reverse       | GTGGCTGCTCGTAGTTGTGA    |
| <i>ctl-2</i>  | Forward       | TCCGTGACCCTATCCACTTC    |
|               | Reverse       | TGGGATCCGTATCCATTCAT    |
